# Supplementary material for: Parametric and non-parametric estimation of reference intervals for routine laboratory tests: an analysis of health check-up data for 260 889 young men in the South Korean military
Source: HighWire-hosted journal article supplement (doi:10.1136/bmjopen-2022-062617), 2022-07-01

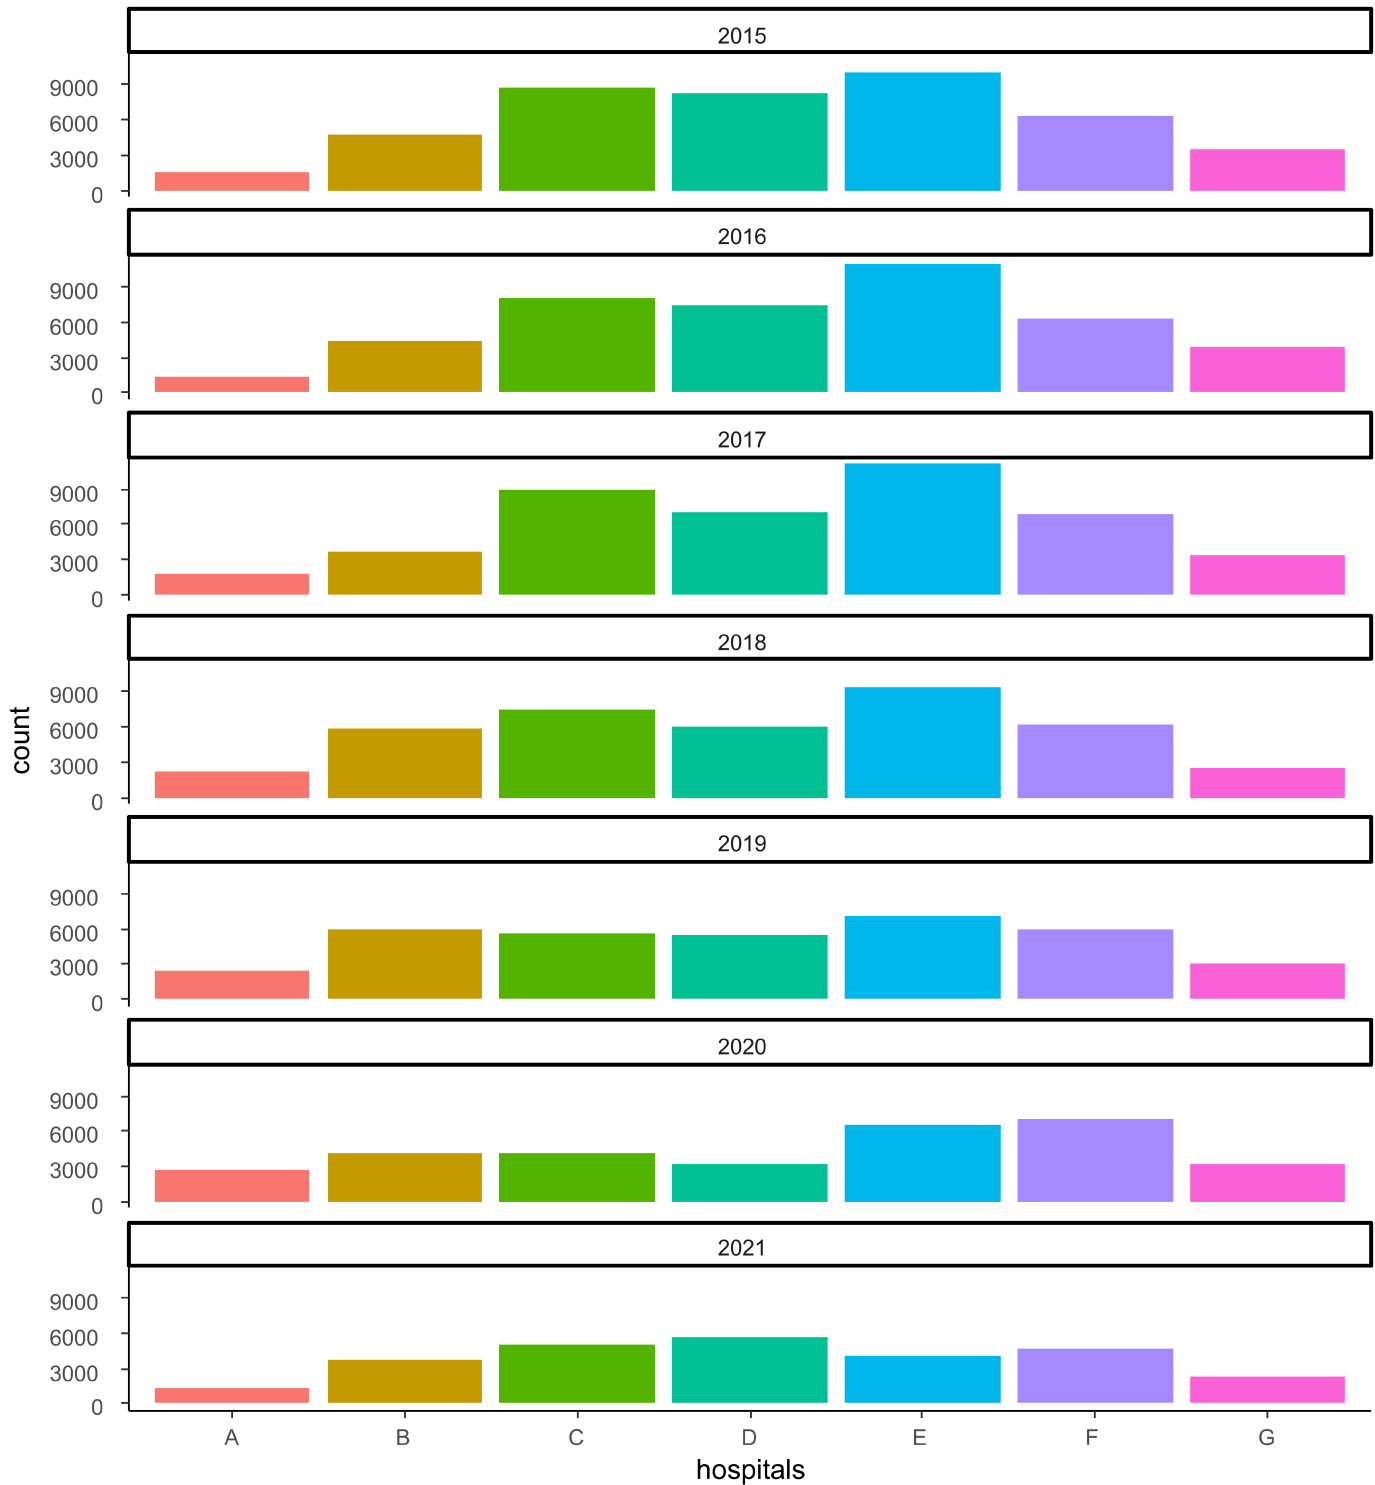

Supplement: bmjopen-2022-062617supp001_data_supplement.pdf [file bmjopen-2022-062617supp001_data_supplement.pdf]
